# Supplementary material for: Serially assessed bisphenol A and phthalate exposure and association with kidney function in children with chronic kidney disease in the US and Canada: A longitudinal cohort study
Source: PLoS Med. 2020 Oct 14;17(10):e1003384. doi: 10.1371/journal.pmed.1003384 (PMC7556524; doi:10.1371/journal.pmed.1003384)
Supplement: S2 Table — (DOCX) [file pmed.1003384.s004.docx]

| **S2 Table**. Associations between calendar year and urinary chemical concentrations over time from linear mixed-effects models | | | | |
| --- | --- | --- | --- | --- |
| Exposure | Parameter | Estimate | 95% CI | p-value |
| BPA |  | -0.042 | -0.062, -0.022 | <0.001 |
|  |  | 0.005 | -0.020, 0.030 | 0.707 |
| PA |  | -0.009 | -0.029, 0.011 | 0.352 |
|  |  | 0.195 | 0.171, 0.219 | <0.001 |
| LMW |  | -0.040 | -0.064, -0.016 | 0.001 |
|  |  | -0.006 | -0.028, 0.016 | 0.561 |
| HMW |  | -0.052 | -0.074, -0.030 | <0.001 |
|  |  | 0.054 | 0.030, 0.078 | <0.001 |
| DEHP |  | -0.066 | -0.086, -0.046 | <0.001 |
|  |  | 0.045 | 0.021, 0.069 | <0.001 |
| DOP |  | -0.089 | -0.11, -0.069 | <0.001 |
|  |  | -0.193 | -0.22, -0.169 | <0.001 |
| Estimates were derived from the following model: where is the ln-transformed urinary concentration of each exposure, is the year of -th observation for subject , is the year of 1st observation for subject , and is a random intercept. Hence, () represents change in years from the first observation to th observation. represents the effect of year of enrollment on the average change in. represents the longitudinal effect of year in the expected change in for a given subject. | | | | |
